# Supplementary material for: Impact of the Universal Implementation of Adolescent Hepatitis B Vaccination in Spain
Source: MDPI journal article supplement (doi:10.3390/vaccines12050488), 2024-05-01
Supplement: s1 [file s1]

**Supplementary Table 1.** Ages in 2005-2021 of persons who were 12 years old in 1991-1996.

|             | 2005 | 2006 | 2007 | 2008 | 2009 | 2010 | 2011 | 2012 | 2013 | 2014 | 2015 | 2016 | 2017 | 2018 | 2019 | 2020 | 2021 |
|-------------|------|------|------|------|------|------|------|------|------|------|------|------|------|------|------|------|------|
| <b>1991</b> | 26   | 27   | 28   | 29   | 30   | 31   | 32   | 33   | 34   | 35   | 36   | 37   | 38   | 39   | 40   | 41   | 42   |
| <b>1992</b> | 25   | 26   | 27   | 28   | 29   | 30   | 31   | 32   | 33   | 34   | 35   | 36   | 37   | 38   | 39   | 40   | 41   |
| <b>1993</b> | 24   | 25   | 26   | 27   | 28   | 29   | 30   | 31   | 32   | 33   | 34   | 35   | 36   | 37   | 38   | 39   | 40   |
| <b>1994</b> | 23   | 24   | 25   | 26   | 27   | 28   | 29   | 30   | 31   | 32   | 33   | 34   | 35   | 36   | 37   | 38   | 39   |
| <b>1995</b> | 22   | 23   | 24   | 25   | 26   | 27   | 28   | 29   | 30   | 31   | 32   | 33   | 34   | 35   | 36   | 37   | 38   |
| <b>1996</b> | 21   | 22   | 23   | 24   | 25   | 26   | 27   | 28   | 29   | 30   | 31   | 32   | 33   | 34   | 35   | 36   | 37   |

Note: 12 years was the average age at which vaccination began.
